# Supplementary material for: Epidemiology and Survival outcomes of HIV-associated cervical cancer in Nigeria
Source: PubMed Central journal article supplement (PMC10441483; doi:10.1101/2023.08.08.23293820), 2023-08-13
Supplement: NIHPP2023.08.08.23293820v1-supplement-1.pdf [file NIHPP2023.08.08.23293820v1-supplement-1.pdf]

**Supplementary file:** Scanned histopathologic images of cervical cancer with tumor grading

Overall Survival

Advanced Not advanced

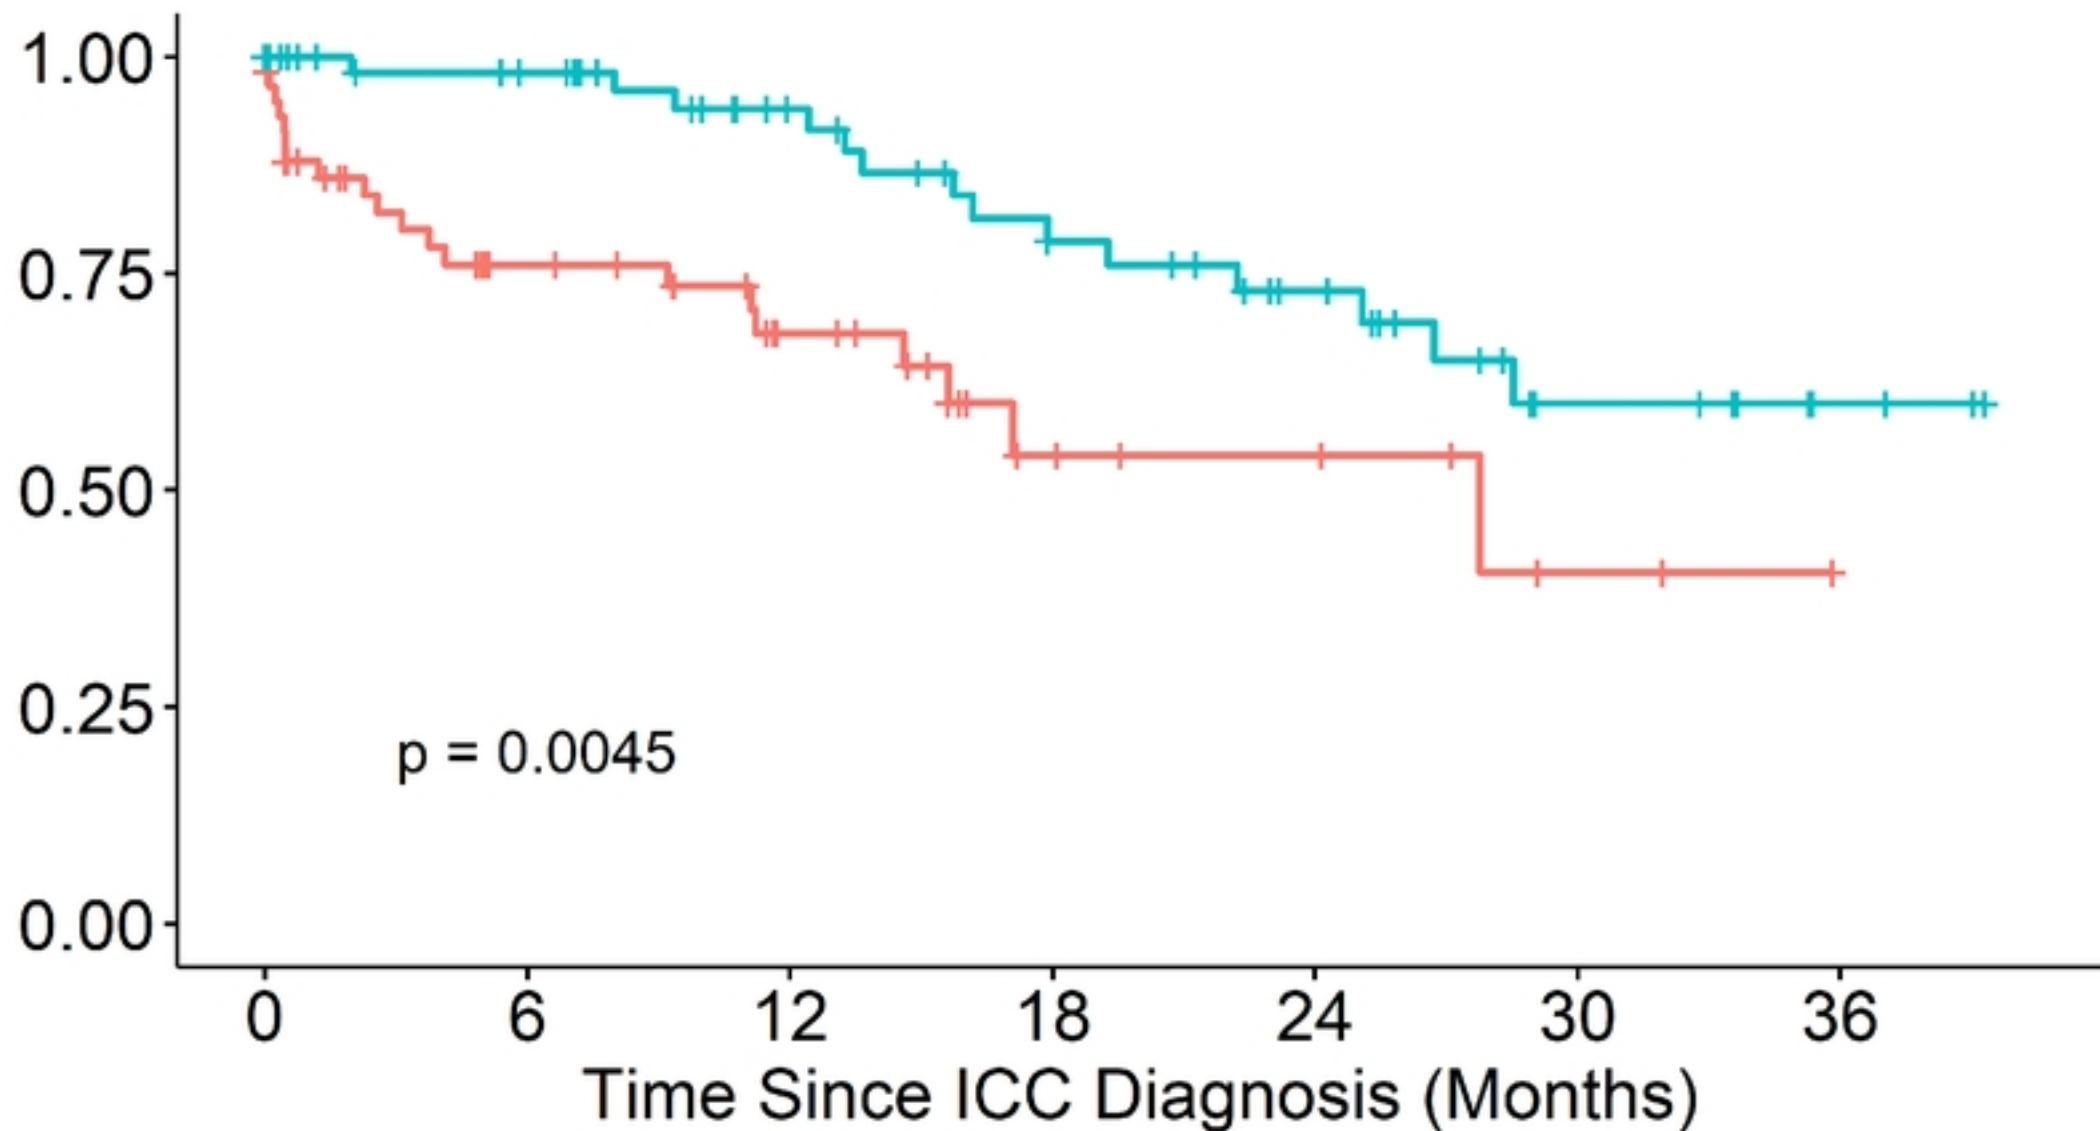

p = 0.0045

Number at risk (number of events)

|              | 0      | 6       | 12      | 18     | 24      | 30     | 36     |
|--------------|--------|---------|---------|--------|---------|--------|--------|
| Advanced     | 79 (0) | 33 (13) | 21 (16) | 8 (19) | 6 (19)  | 2 (20) | 0 (20) |
| Not advanced | 68 (0) | 52 (1)  | 39 (3)  | 29 (9) | 21 (11) | 9 (14) | 3 (14) |

Figure
